# Supplementary material
Source: PubMed Central journal article supplement (PMC3186875)
Supplement: NIHMS309315-supplement-01.pdf [file NIHMS309315-supplement-01.pdf]

**Table 4. Supplemental Table showing Interaction Terms and Impact of Covariates on Smoking Effect.**

| <b>Risk factors</b>                                                | <b>P</b>                         |
|--------------------------------------------------------------------|----------------------------------|
| Smoking during pregnancy x gender                                  | 0.11                             |
| Smoking during pregnancy x age groups                              | 0.21                             |
| Smoking during pregnancy x race groups                             | 0.42                             |
| <b>Risk factors</b>                                                |                                  |
| Smoking during pregnancy , adjusting only for gender               | OR=1.23 (0.97, 1.55)<br>p=0.08   |
| Smoking during pregnancy , adjusting only for age groups           | OR=1.23 (0.97, 1.56)<br>p=0.08   |
| Smoking during pregnancy , adjusting only for racial/ethnic groups | OR=1.50 (1.18, 1.91)<br>p=0.0008 |

OR = Odds Ratio
